# Supplementary material for: The Influence of External Environment Factors on Farmers’ Willingness to Withdraw from Rural Homesteads: Evidence from Wuhan and Suizhou City in Central China
Source: MDPI journal article supplement (doi:10.3390/land11091602), 2022-09-18
Supplement: s1 [file s1]

Questionnaire (parts relevant to this study):

Interviewer:\_\_\_\_\_ Interview Time:\_\_\_\_\_ Questionnaire ID:\_\_\_\_\_  
City:\_\_\_\_\_ Town:\_\_\_\_\_ Village:\_\_\_\_\_ ( ☐ Tourism Resource )

**Part 1 Basic Information of Farmers**

1. Gender:  
☐ Male ☐ Female
2. Age:  
☐ < 30 years old ☐ 30 - 50 years old ☐ > 50 years old
3. Education level:  
☐ Primary school and below ☐ Junior high school  
☐ Senior high school or technical secondary college  
☐ Junior college ☐ Undergraduate and above
4. Number of family members:\_\_\_\_\_
5. Household annual income:\_\_\_\_\_ (CNY)
6. Proportion of agricultural income in total income:  
☐ More than 90% ☐ Less than 90%
7. Have houses in urban area:  
☐ YES ☐ NO
8. Who do you think owns the rural homestead ownership:  
☐ Belongs to the collective ☐ Belongs to the personal/country
9. Can a household buy/sell its rural homesteads:  
☐ YES ☐ NO

**Part 2 Status of Homesteads**

1. Homestead size:  
☐ < 100 m<sup>2</sup> ☐ 100-200 m<sup>2</sup> ☐ 200-300 m<sup>2</sup> ☐ > 300 m<sup>2</sup>
2. Number of the homestead:\_\_\_\_\_

**Part 3 Willingness of Rural Homesteads Withdrawal**

1. Would you be willing to withdraw from rural homesteads  
☐ Willing ☐ Unwilling

2. Why you are willing/unwilling to withdraw from rural homesteads:

---

3. If willing, what way do you propose to reuse the rural homesteads:

---

4. Other suggestions:

---

Interviewee:

Cellphone Number:
